# Supplementary material for: Promoting Population Behavioral Health in a Safety-Net Health System During the COVID-19 Pandemic
Source: Atypon-hosted journal article supplement (doi:10.1176/appi.ps.202000546), 2021-04-22
Supplement: appi.ps.202000546.ds001.pdf [file appi.ps.202000546.ds001.pdf]

Table 1. Schema of outpatient stepped model of care.

| <b>Tier</b> | <b>Indication/severity</b><br>Considerations include:<br>- Clinical scales (e.g., PHQ-9)<br>- Social instability (e.g., housing insecurity, food insecurity, domestic violence) | <b>Provider</b>                                                                                                                        | <b>Treatment modalities</b>                                                                                                                                    | <b>Goal</b>                                                                            |
|-------------|---------------------------------------------------------------------------------------------------------------------------------------------------------------------------------|----------------------------------------------------------------------------------------------------------------------------------------|----------------------------------------------------------------------------------------------------------------------------------------------------------------|----------------------------------------------------------------------------------------|
| 3           | Moderate-severe severity<br>- Clinical risk: e.g., active suicidality, active aggression, recent hospitalization                                                                | Clinician<br><br>Psychopharmacologist<br><br>Case worker<br>+/- other community providers (e.g., Department of Mental Health services) | Psychosocial<br>- Full array of clinical services<br>- Case management<br>- Connections with community resources<br><br>Pharmacotherapy<br>- Ongoing treatment | Tertiary prevention: Stabilize and prevent emergency and inpatient service utilization |
| 2           | Mild-moderate severity                                                                                                                                                          | Clinician<br>+/-<br>Psychopharmacologist<br>+/-<br>Case worker                                                                         | Psychosocial<br>- Time-limited clinical strategies<br>- Case management as needed<br><br>Pharmacotherapy<br>- As needed                                        | Secondary prevention: Prevent escalation of existing illness                           |
| 1           | Early or resolving mood/anxiety/substance use disorder                                                                                                                          | MBCT-R teacher                                                                                                                         | Psychosocial<br>- MBCT-R class<br><br>Pharmacotherapy<br>- N/A or through primary care                                                                         | Primary/secondary prevention: Prevent recurrent illness and support resolving illness  |
